# Supplementary material
Source: PubMed Central journal article supplement (PMC4936860)
Supplement: Tentler_Suppl1_Survey1.pdf [file Tentler_Suppl1_Survey1.pdf]

[Edit this form](#)

Tentler A, Feurdean M, Keller S, Kothari N. Integrating a Resident-Driven Longitudinal Quality Improvement Curriculum Within an Ambulatory Block Schedule. *J Grad Med Educ.* 2016;8(3):405-409.

# Resident Survey on the Quality Assessment & Improvement (QA/QI) Program

Over the course of this and previous years, you've all been participating in the residency's QA/QI program, meeting with mentors each Ambulatory block and moving your project along. We'd like to get some feedback on how effective and how useful the program has been so far.

**\*Required**

**What PGY level are you? \***

- PGY-1
- PGY-2
- PGY-3

**Was our residency's QI program your first exposure to QI? \***

- Yes
- No

**Where did you finish medical school? \***

- Allopathic US Medical School
- Osteopathic US Medical School
- International Medical School (All Clinical Year Training in US Hospitals)
- International Medical School

**How useful did you find the following components of the QI program? \***

|                                                                 | N/A                   | Not useful at all     | Not too useful        | Somewhat useful       | Extremely useful      |
|-----------------------------------------------------------------|-----------------------|-----------------------|-----------------------|-----------------------|-----------------------|
| Dr. Tentler's QI lecture in August                              | <input type="radio"/> |
| The IHI online modules (PGY-1s only)                            | <input type="radio"/> |
| QI group meetings with mentors each ambulatory block            | <input type="radio"/> |
| Dedicated time during ambulatory blocks to work on QI/research  | <input type="radio"/> |
| The actual experience of working on and completing a QI project | <input type="radio"/> |
| Clinical usefulness of your project                             | <input type="radio"/> |

**Indicate your agreement or disagreement with the following about participating in the QI program:**

\*

|                                                                               | Strongly Disagree     | Disagree              | Agree                 | Strongly Agree        |
|-------------------------------------------------------------------------------|-----------------------|-----------------------|-----------------------|-----------------------|
| It changed my understanding of quality in health care at the clinical site(s) | <input type="radio"/> | <input type="radio"/> | <input type="radio"/> | <input type="radio"/> |
| It changed my understanding of quality in health care in general              | <input type="radio"/> | <input type="radio"/> | <input type="radio"/> | <input type="radio"/> |
| It changed my behavior as a physician                                         | <input type="radio"/> | <input type="radio"/> | <input type="radio"/> | <input type="radio"/> |
| I've taught others the information I learned in the QI program                | <input type="radio"/> | <input type="radio"/> | <input type="radio"/> | <input type="radio"/> |
| I enjoyed working on the QI project                                           | <input type="radio"/> | <input type="radio"/> | <input type="radio"/> | <input type="radio"/> |
| Our group worked well together                                                | <input type="radio"/> | <input type="radio"/> | <input type="radio"/> | <input type="radio"/> |

Tentler A, Feurdean M, Keller S, Kothari N. Integrating a Resident-Driven Longitudinal Quality Improvement Curriculum Within an Ambulatory Block Schedule. *J Grad Med Educ.* 2016;8(3):405-409.

I would recommend this way of learning QI to other residency programs

Four radio button options for a Likert scale response.

**Additional thoughts, comments, or feedback?**

Text input area for providing additional thoughts, comments, or feedback.

**Do you have any suggestions on the best way to put together the QI groups?**

Text input area for providing suggestions on the best way to put together the QI groups.

Submit

*Never submit passwords through Google Forms.*

Powered by

This content is neither created nor endorsed by Google.

[Report Abuse](#) - [Terms of Service](#) - [Additional Terms](#)

Tentler A, Feurdean M, Keller S, Kothari N. Integrating a Resident-Driven Longitudinal Quality Improvement Curriculum Within an Ambulatory Block Schedule. *J Grad Med Educ.* 2016;8(3):405-409.
