# Supplementary material
Source: PubMed Central journal article supplement (PMC4936860)
Supplement: Tentler_Suppl1_Survey2.pdf [file Tentler_Suppl1_Survey2.pdf]

[Edit this form](#)

Tentler A, Feurdean M, Keller S, Kothari N. Integrating a Resident-Driven Longitudinal Quality Improvement Curriculum Within an Ambulatory Block Schedule. *J Grad Med Educ.* 2016;8(3):405-409.

## NJMS Internal Medicine Alumni Survey on the Quality Improvement (QI) Program

Over the course of your residency, you've participated in the residency's QA/QI program, meeting with mentors on a regular basis and working on projects in groups. We'd like to get some feedback on how effective and how useful the program has been and whether the skills you learned in it have been useful to you in your practice.

\*Required

What year did you graduate the residency program? \*

- 2012
- 2013
- 2014

Was our residency's QI program your first exposure to QI? \*

- Yes
- No

Where did you finish medical school? \*

- Allopathic US Medical School
- Osteopathic US Medical School
- International Medical School (All Clinical Year Training in US Hospitals)
- International Medical School

**How useful did you find the following components of the QI program? \***

|                                                                 | N/A                   | Not useful at all     | Not too useful        | Somewhat useful       | Extremely useful      |
|-----------------------------------------------------------------|-----------------------|-----------------------|-----------------------|-----------------------|-----------------------|
| Introductory QI lecture in August                               | <input type="radio"/> |
| Regular QI group meetings with mentors                          | <input type="radio"/> |
| Dedicated time during ambulatory blocks to work on QI/research  | <input type="radio"/> |
| The actual experience of working on and completing a QI project | <input type="radio"/> |
| Clinical usefulness of your project                             | <input type="radio"/> |

**Indicate your agreement or disagreement with the following about participating in the QI program:**

\*

|                                                                               | Strongly Disagree     | Disagree              | Agree                 | Strongly Agree        |
|-------------------------------------------------------------------------------|-----------------------|-----------------------|-----------------------|-----------------------|
| It changed my understanding of quality in health care at the clinical site(s) | <input type="radio"/> | <input type="radio"/> | <input type="radio"/> | <input type="radio"/> |
| It changed my understanding of quality in health care in general              | <input type="radio"/> | <input type="radio"/> | <input type="radio"/> | <input type="radio"/> |
| It changed my behavior as a physician                                         | <input type="radio"/> | <input type="radio"/> | <input type="radio"/> | <input type="radio"/> |
| I've taught others the information I learned in the QI program                | <input type="radio"/> | <input type="radio"/> | <input type="radio"/> | <input type="radio"/> |
| I enjoyed working on the QI project                                           | <input type="radio"/> | <input type="radio"/> | <input type="radio"/> | <input type="radio"/> |
| Our group worked well together                                                | <input type="radio"/> | <input type="radio"/> | <input type="radio"/> | <input type="radio"/> |
| I would recommend this way of learning QI to other residency programs         | <input type="radio"/> | <input type="radio"/> | <input type="radio"/> | <input type="radio"/> |

Tentler A, Feurdean M, Keller S, Kothari N. Integrating a Resident-Driven Longitudinal Quality Improvement Curriculum Within an Ambulatory Block Schedule. *J Grad Med Educ.* 2016;8(3):405-409.

The skills I  
learned in the QI  
program have  
been useful to me  
in my practice

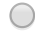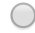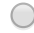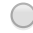

### Additional thoughts, comments, or feedback?

Submit

*Never submit passwords through Google Forms.*

Powered by

This content is neither created nor endorsed by Google.

[Report Abuse](#) - [Terms of Service](#) - [Additional Terms](#)

Tentler A, Feurdean M, Keller S, Kothari N. Integrating a Resident-Driven Longitudinal Quality Improvement Curriculum Within an Ambulatory Block Schedule. *J Grad Med Educ.* 2016;8(3):405-409.
